# Supplementary material for: Construction of the influenza A virus infection-induced cell-specific inflammatory regulatory network based on mutual information and optimization
Source: PubMed Central journal article supplement (PMC4016583; doi:10.1186/1752-0509-7-105), 2013-10-20

**Comparisons between the numerical simulation results and experimental data of proteins in the optimized network (Figure 4 in the main text).**

The blue and red lines denote the experiment and simulation results, respectively. The stars represent experimental data at each time point. The experimental errors are also plotted as short bars at each time point.

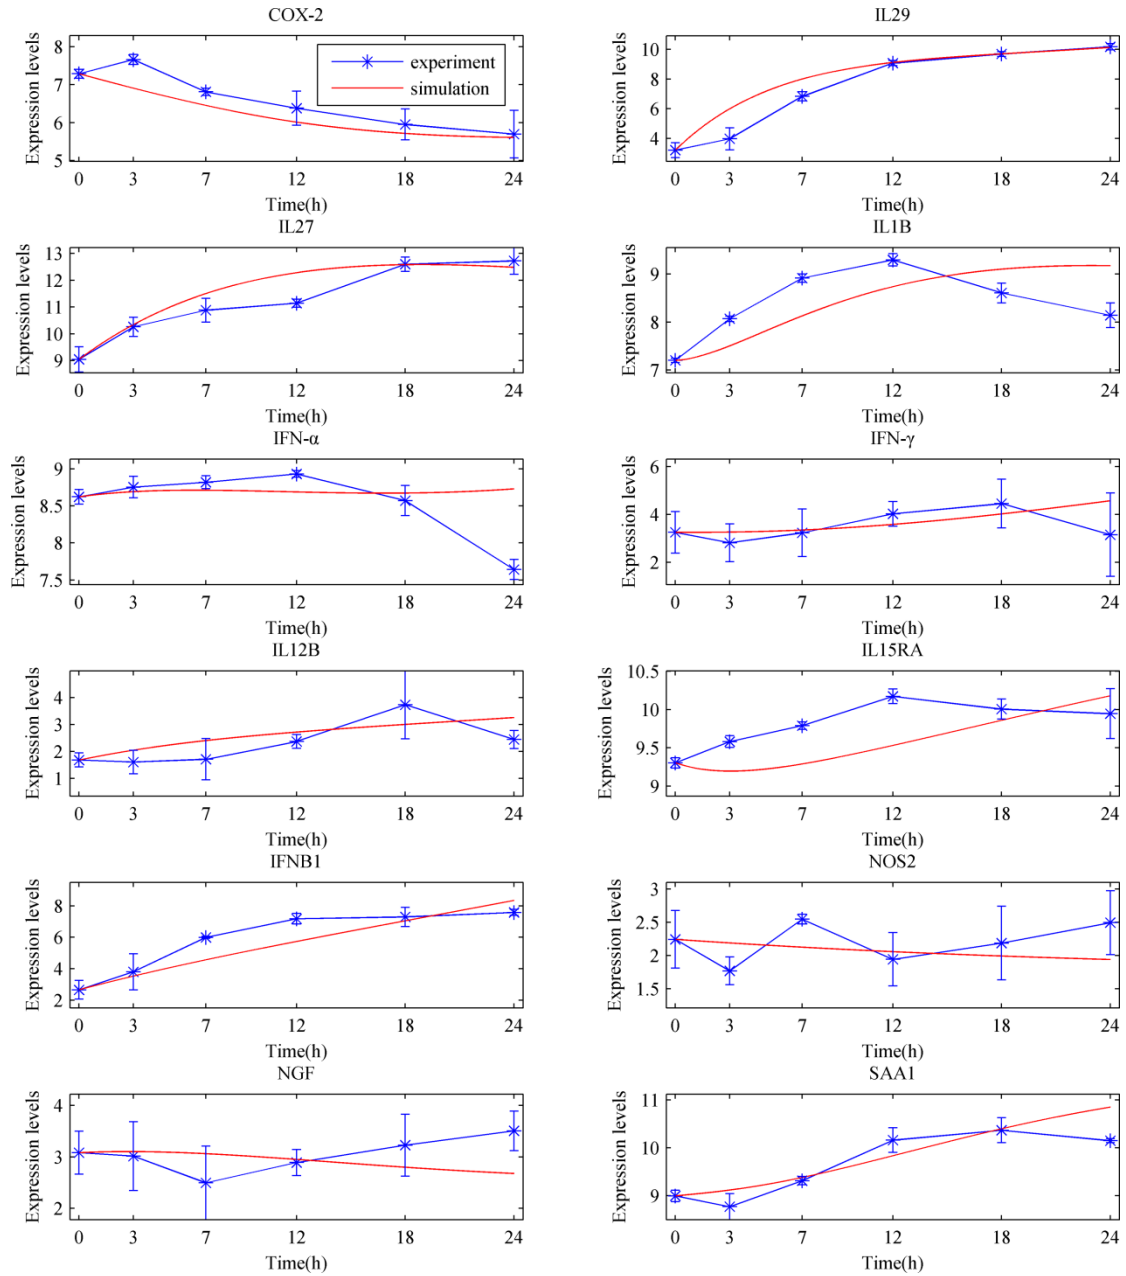

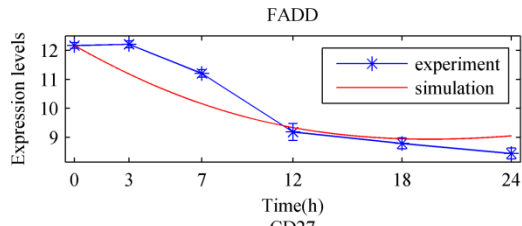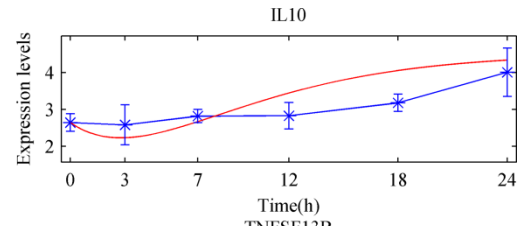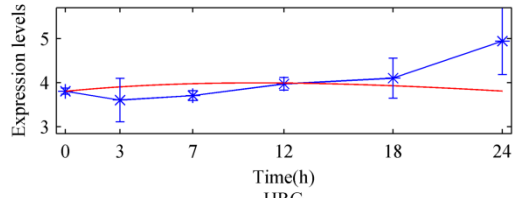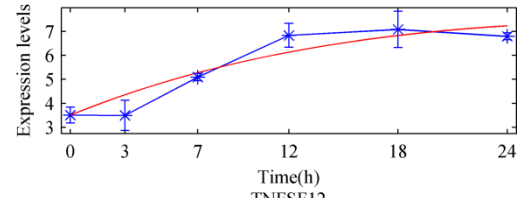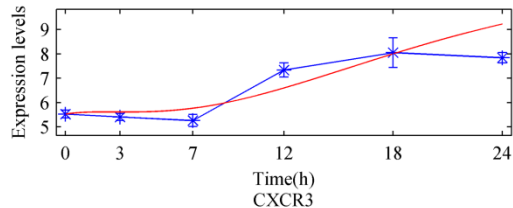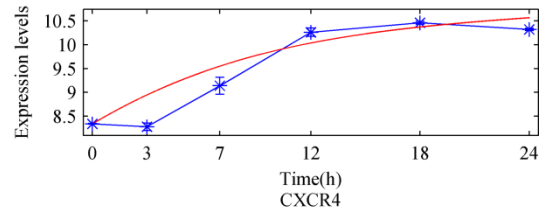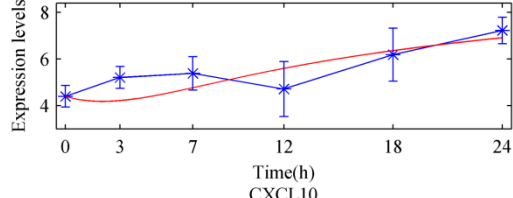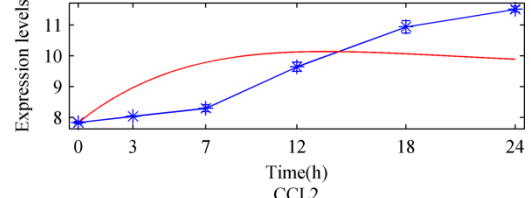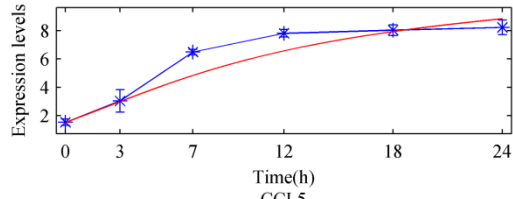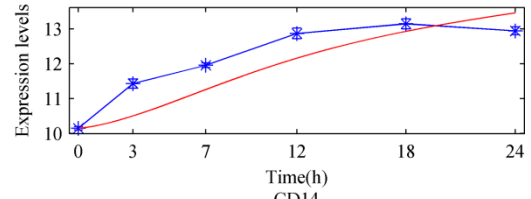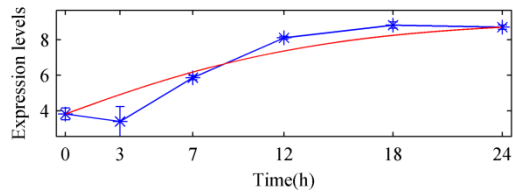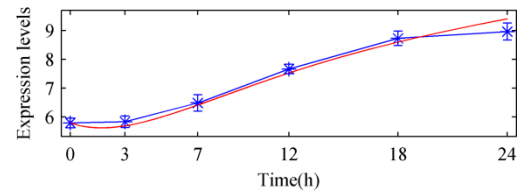

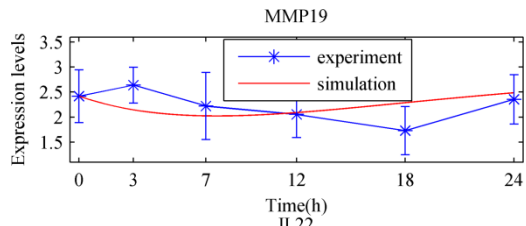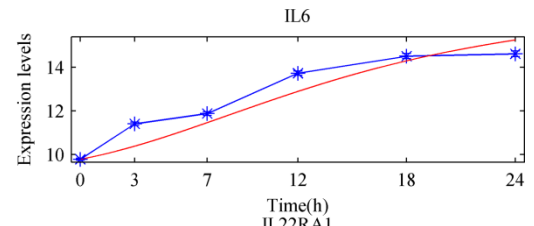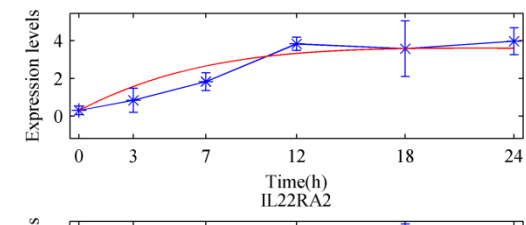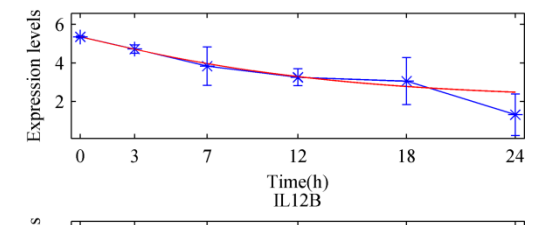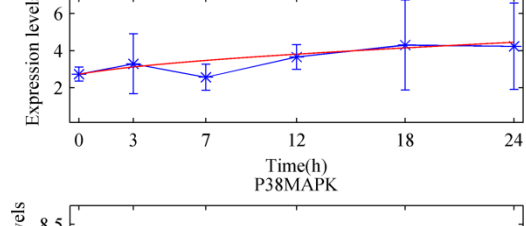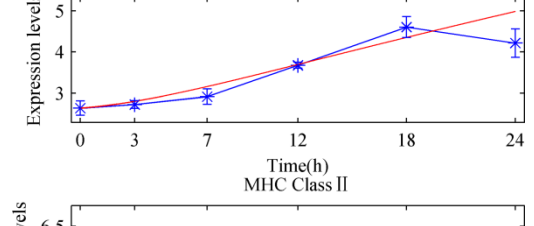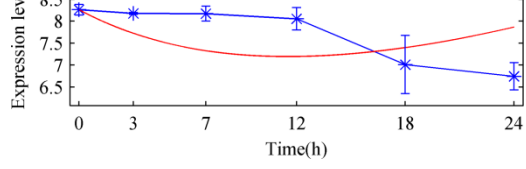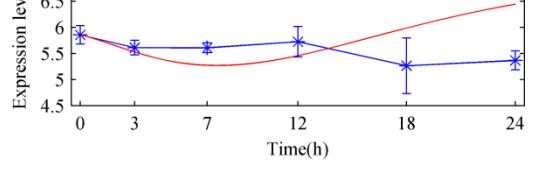

Supplement: 1752-0509-7-105-S5.pdf [file 1752-0509-7-105-S5.pdf]
