# Supplementary material for: Construction of the influenza A virus infection-induced cell-specific inflammatory regulatory network based on mutual information and optimization
Source: PubMed Central journal article supplement (PMC4016583; doi:10.1186/1752-0509-7-105), 2013-10-20
Supplement: 1752-0509-7-105-S4.pdf [file 1752-0509-7-105-S4.pdf]

This file includes one additional Table S2 that lists the optimal parameter values obtained by DE algorithm.

Table S2 The optimal parameter values obtained by DE algorithm.

| Kinetic parameter | Optimal value | Kinetic parameter | Optimal value | Kinetic parameter  | Optimal value | Kinetic parameter | Optimal value |
|-------------------|---------------|-------------------|---------------|--------------------|---------------|-------------------|---------------|
| $k_1$             | 8.500e-05     | $k_{21_{14}}$     | 0             | $k_{36_{30}}$      | 0             | $d_3$             | 4.500e-05     |
| $k_{2_{1}}$       | 2.118e-05     | $k_{22}$          | 1.427e-05     | $k_{36_{32}}$      | 2.108e-05     | $d_4$             | 8.800e-06     |
| $k_3$             | 8.560e-06     | $k_{22_{3}}$      | 1.000e-05     | $k_{36_{35}}$      | 5.640e-06     | $d_5$             | 4.792e-05     |
| $k_{3_{2}}$       | 0             | $k_{22_{25}}$     | 1.018e-06     | $k_{36_{37}}$      | 0             | $d_6$             | 9.215e-05     |
| $k_{3_{15}}$      | 1.026e-05     | $k_{22_{26}}$     | 0             | $k_{36_{39}}$      | 0             | $d_7$             | 7.200e-05     |
| $k_{3_{47}}$      | 4.712e-05     | $k_{22_{43}}$     | 3.984e-05     | $k_{37_{2}}$       | 0             | $d_8$             | 3.600e-05     |
| $k_{4_{2}}$       | 8.000e-06     | $k_{23_{2}}$      | 0             | $k_{37_{28}}$      | 5.538e-05     | $d_9$             | 1.802e-05     |
| $k_{4_{7}}$       | 0             | $k_{23_{22}}$     | 1.383e-05     | $k_{38_{2}}$       | 0             | $d_{10}$          | 0             |
| $k_{4_{15}}$      | 2.821e-05     | $k_{24_{2}}$      | 0             | $k_{38_{36}}$      | 9.160e-06     | $d_{11}$          | 2.672e-05     |
| $k_{5_{2}}$       | 2.565e-05     | $k_{24_{25}}$     | 1.000e-05     | $k_{39_{2}}$       | 0             | $d_{12}$          | 5.300e-05     |
| $k_{5_{6}}$       | 3.942e-05     | $k_{25}$          | 1.709e-05     | $k_{39_{28}}$      | 0             | $d_{13}$          | 3.000e-06     |
| $k_{5_{14}}$      | 1.230e-06     | $k_{26}$          | 6.925e-05     | $k_{39_{29}}$      | 0             | $d_{14}$          | 6.570e-06     |
| $k_6$             | 8.300e-07     | $k_{26_{2}}$      | 0             | $k_{39_{30}}$      | 3.112e-05     | $d_{15}$          | 4.592e-05     |
| $k_{6_{4}}$       | 4.629e-05     | $k_{26_{25}}$     | 1.800e-05     | $k_{39_{35}}$      | 1.811e-05     | $d_{16}$          | 0             |
| $k_{6_{5}}$       | 2.050e-05     | $k_{27_{2}}$      | 0             | $k_{39_{36}}$      | 2.994e-05     | $d_{17}$          | 2.683e-05     |
| $k_{6_{17}}$      | 1.612e-05     | $k_{27_{22}}$     | 7.500e-05     | $k_{39_{37}}$      | 1.000e-05     | $d_{18}$          | 0             |
| $k_{6_{19}}$      | 0             | $k_{28}$          | 7.200e-06     | $k_{39_{46}}$      | 0             | $d_{19}$          | 1.800e-05     |
| $k_7$             | 6.354e-05     | $k_{28_{2}}$      | 2.500e-05     | $k_{40_{2}}$       | 0             | $d_{20}$          | 4.194e-05     |
| $k_{7_{14}}$      | 0             | $k_{28_{9}}$      | 3.331e-05     | $k_{41_{2}}$       | 0             | $d_{21}$          | 0             |
| $k_{7_{47}}$      | 1.000e-05     | $k_{28_{29}}$     | 0             | $k_{42_{2}}$       | 0             | $d_{22}$          | 7.000e-05     |
| $k_{8_{48}}$      | 3.268e-05     | $k_{28_{30}}$     | 0             | $k_{42_{46}}$      | 0             | $d_{23}$          | 1.500e-05     |
| $k_{9_{46}}$      | 2.200e-05     | $k_{28_{34}}$     | 1.000e-07     | $k_{43_{44_{45}}}$ | 1.000e-05     | $d_{24}$          | 1.500e-05     |
| $k_{10_{6}}$      | 0             | $k_{28_{35}}$     | 0             | $k_{44_{2}}$       | 2.710e-05     | $d_{25}$          | 2.059e-05     |
| $k_{11}$          | 1.128e-05     | $k_{28_{36}}$     | 7.910e-06     | $k_{45_{2}}$       | 3.000e-05     | $d_{26}$          | 8.000e-05     |
| $k_{11_{2}}$      | 0             | $k_{28_{37}}$     | 0             | $k_{46_{28}}$      | 8.950e-06     | $d_{27}$          | 3.000e-05     |
| $k_{11_{47}}$     | 7.910e-06     | $k_{28_{39}}$     | 7.300e-07     | $k_{46_{39}}$      | 0             | $d_{28}$          | 4.700e-05     |
| $k_{11_{48}}$     | 0             | $k_{28_{46}}$     | 0             | $k_{47_{7}}$       | 5.750e-06     | $d_{29}$          | 0             |
| $k_{12_{2}}$      | 0             | $k_{29_{2}}$      | 0             | $k_{47_{13}}$      | 1.412e-05     | $d_{30}$          | 1.000e-05     |
| $k_{12_{48}}$     | 6.000e-05     | $k_{30_{2}}$      | 2.014e-05     | $k_{47_{15}}$      | 0             | $d_{31}$          | 6.000e-05     |
| $k_{13_{15}}$     | 1.000e-06     | $k_{31_{2}}$      | 0             | $k_{47_{19}}$      | 0             | $d_{32}$          | 4.563e-05     |
| $k_{13_{47}}$     | 1.063e-05     | $k_{31_{28}}$     | 5.000e-05     | $k_{48}$           | 5.020e-06     | $d_{33}$          | 0             |
| $k_{14_{5}}$      | 1.000e-06     | $k_{31_{40}}$     | 0             | $k_{48_{15}}$      | 0             | $d_{34}$          | 4.600e-05     |
| $k_{15}$          | 2.700e-05     | $k_{32}$          | 1.745e-05     | $k_{48_{16}}$      | 0             | $d_{35}$          | 8.300e-05     |
| $k_{15_{2}}$      | 1.540e-06     | $k_{32_{2}}$      | 4.832e-05     | $k_{48_{17}}$      | 3.419e-05     | $d_{36}$          | 3.176e-05     |
| $k_{15_{4}}$      | 0             | $k_{32_{28}}$     | 0             | $k_{48_{19}}$      | 3.083e-05     | $d_{37}$          | 4.800e-05     |

|              |           |              |           |              |           |          |           |
|--------------|-----------|--------------|-----------|--------------|-----------|----------|-----------|
| $k_{15\_13}$ | 0         | $k_{33\_28}$ | 0         | $k_{49}$     | 8.990e-06 | $d_{38}$ | 2.874e-05 |
| $k_{15\_19}$ | 1.000e-06 | $k_{34\_2}$  | 0         | $k_{49\_22}$ | 4.380e-05 | $d_{39}$ | 5.842e-05 |
| $k_{16\_2}$  | 0         | $k_{34\_28}$ | 5.052e-05 | $k_{49\_25}$ | 1.000e-05 | $d_{40}$ | 0         |
| $k_{16\_11}$ | 0         | $k_{34\_32}$ | 0         | $k_{49\_28}$ | 1.000e-06 | $d_{41}$ | 0         |
| $k_{16\_48}$ | 0         | $k_{35\_2}$  | 2.000e-05 | $k_{50\_36}$ | 0         | $d_{42}$ | 0         |
| $k_{17\_2}$  | 1.199e-05 | $k_{35\_28}$ | 2.000e-05 | $a_1$        | 0.002     | $d_{43}$ | 3.095e-05 |
| $k_{18}$     | 4.900e-05 | $k_{35\_30}$ | 4.938e-05 | $a_2$        | 0.002     | $d_{44}$ | 2.070e-05 |
| $k_{19\_2}$  | 1.720e-06 | $k_{35\_32}$ | 1.000e-05 | $a_3$        | 1.000e-05 | $d_{45}$ | 1.000e-05 |
| $k_{19\_6}$  | 2.215e-05 | $k_{35\_36}$ | 0         | $a_4$        | 2.387e-05 | $d_{46}$ | 1.000e-05 |
| $k_{20\_2}$  | 0         | $k_{35\_37}$ | 2.451e-05 | $a_5$        | 1.000e-05 | $d_{47}$ | 1.800e-05 |
| $k_{20\_18}$ | 0         | $k_{35\_39}$ | 0         | $a_6$        | 2.519e-05 | $d_{48}$ | 5.000e-05 |
| $k_{20\_47}$ | 5.000e-05 | $k_{36\_2}$  | 0         | $d_1$        | 3.790e-05 | $d_{49}$ | 4.500e-05 |
| $k_{20\_48}$ | 0         | $k_{36\_28}$ | 7.700e-07 | $d_2$        | 5.000e-06 | $d_{50}$ | 0         |

Note: If the optimal value of the kinetic parameter  $k_{i\_j}$  is zero, then we will delete the directed edge which indicates biomolecular  $j$  regulates biomolecular  $i$  in the network. Furthermore, if there is not any edge linking biomocular  $i$ , we will delete the node  $i$  in the network. At last, if the node  $i$  has been deleted in the network, we let the degradation rate  $d_i$  is zero in the numerical simulation. Therefore, the optimal value of the kinetic parameter  $d_i$  which is zero indicates the node  $i$  has been deleted in the network.
